# Supplementary material for: Do Current Fortification and Supplementation Programs Assure Adequate Intake of Fat-Soluble Vitamins in Belgian Infants, Toddlers, Pregnant Women, and Lactating Women?
Source: PubMed Central journal article supplement (PMC5852799; doi:10.3390/nu10020223), 2018-02-16
Supplement: nutrients-10-00223-s001.pdf [file nutrients-10-00223-s001.pdf]

**Table S1** | Usual intake of **vitamin A, D, E and K** ( $\mu\text{g/day}$ ) from food, fortified food and supplements in **infants (0-6 months)**, Belgian study on the intake of vitamins A, D, E and K (VITADEK-study) 2015.

| Source            |                               | EAR/AI <sup>(1,2)</sup> | UL <sup>(3)</sup> | Usual intake | % contribution | 5    | 50   | 95    | % < EAR/<br>Risk of inadequacy | % > UL | Usual intake        | % contribution | 5    | 50    | 95    | % < EAR/<br>Risk of inadequacy | % > UL |
|-------------------|-------------------------------|-------------------------|-------------------|--------------|----------------|------|------|-------|--------------------------------|--------|---------------------|----------------|------|-------|-------|--------------------------------|--------|
| Breastfed infants |                               |                         |                   |              |                |      |      |       |                                |        | Formula-fed infants |                |      |       |       |                                |        |
| VITAMIN A         | Food                          | 180                     | 800               | 580          | 99.3           | 497  | 551  | 905   | 0.00                           | 0.00   | 283                 | 45.7           | 10   | 248   | 725   | 36                             | 0.00   |
|                   | + mandatorily fortified food  | 180                     | 800               | 583          | 0.5            | 497  | 551  | 905   | 0.00                           | 0.00   | 623                 | 53.5           | 398  | 600   | 1005  | 0.00                           | 0.97   |
|                   | + voluntarily fortified foods | 180                     | 800               | 584          | 0.2            | 497  | 551  | 905   | 0.00                           | 0.00   | 627                 | 0.8            | 398  | 601   | 1012  | 0.00                           | 1.45   |
|                   | + supplements                 | 180                     | 800               | 584          | 0              | 497  | 551  | 908   | 0.00                           | 0.00   | 627                 | 0              | 398  | 601   | 1012  | 0.00                           | 1.45   |
| VITAMIN D         | Food                          | 10                      | 25                | 0.84         | 7.4            | 0.78 | 0.87 | 1.01  | ns                             | 0.00   | 0.22                | 0.6            | 0.00 | 0.10  | 0.91  | ns                             | 0.00   |
|                   | + mandatorily fortified food  | 10                      | 25                | 0.87         | 0.3            | 0.78 | 0.87 | 1.24  | ns                             | 0.00   | 7.93                | 45.6           | 3.02 | 8.01  | 13.50 | ns                             | 0.00   |
|                   | + voluntarily fortified foods | 10                      | 25                | 0.89         | 0.2            | 0.78 | 0.87 | 1.24  | ns                             | 0.00   | 8.03                | 0.6            | 3.02 | 8.01  | 13.65 | ns                             | 0.00   |
|                   | + supplements                 | 10                      | 25                | 11.36        | 92.2           | 0.78 | 10.9 | 25.49 | low                            | 6.06   | 16.82               | 53.2           | 4.19 | 17.96 | 31.48 | low                            | 16.67  |
| VITAMIN E         | Food                          | 4                       | 100               | 2.82         | 99.3           | 2.13 | 2.36 | 6.47  | ns                             | 0.00   | 2.27                | 25.3           | 0.06 | 1.57  | 7.76  | ns                             | 0.00   |
|                   | + mandatorily fortified food  | 4                       | 100               | 2.82         | 0.7            | 2.13 | 2.36 | 6.47  | ns                             | 0.00   | 8.93                | 74.2           | 3.95 | 8.76  | 14.71 | low                            | 0.00   |
|                   | + voluntarily fortified foods | 4                       | 100               | 2.84         | 0              | 2.13 | 2.36 | 6.58  | ns                             | 0.00   | 8.98                | 0.6            | 3.98 | 8.77  | 14.71 | low                            | 0.00   |
|                   | + supplements                 | 4                       | 100               | 2.84         | 99.3           | 2.13 | 2.36 | 6.58  | ns                             | 0.00   | 8.98                | 0              | 3.98 | 8.77  | 14.71 | low                            | 0.00   |
| VITAMIN K         | Food                          | 5                       |                   | 9.28         | 23.3           | 2.13 | 2.36 | 40.29 | ns                             |        | 29.5                | 47.9           | 0.00 | 7.38  | 124.8 | low                            |        |
|                   | + mandatorily fortified food  | 5                       |                   | 9.28         | 0.1            | 2.13 | 2.36 | 40.29 | ns                             |        | 50                  | 33.3           | 1.32 | 43.0  | 127.6 | low                            |        |
|                   | + voluntarily fortified foods | 5                       |                   | 9.30         | 0.1            | 2.13 | 2.36 | 40.29 | ns                             |        | 50.3                | 0.5            | 1.32 | 43.0  | 127.6 | low                            |        |
|                   | + supplements                 | 5                       |                   | 39.89        | 76.7           | 2.13 | 6.53 | 282.1 | low                            |        | 61.6                | 18.3           | 2.92 | 44.8  | 167.9 | low                            |        |

<sup>(1)</sup> For children below 6 months born at full term, there are no reference value based on real needs but adequate intakes are based on observed intakes of exclusively breastfed children. When no value was available (vitamins A and E) the same reference values as for infants 7-11 months were used.

<sup>(2)</sup> The AI for vitamin K is derived from an AI of 1  $\mu\text{g}$  per kg body weight and an average weight of 5 kg for infants aged 0 to < 6 months (60).

<sup>(3)</sup> For infants 0-6 months no UL is set for vitamin K.

EAR: Estimated average requirement; AI: Adequate intake; UL: Upper intake level

**Table S2** | Usual intake of **vitamin A, D, E and K** ( $\mu\text{g/day}$ ) from food, fortified food and supplements in **infants (7-11 months)**, Belgian study on the intake of vitamins A, D, E and K (VITADEK-study) 2015.

| Source            |                               | EAR/AI <sup>(1)</sup> | UL <sup>(1)</sup> | Usual intake | % contribution | 5    | 50   | 95    | % < EAR/<br>Risk of<br>inadequacy | % > UL | Usual intake        | % contribution | 5    | 50    | 95    | % < EAR/<br>Risk of<br>inadequacy | % > UL |
|-------------------|-------------------------------|-----------------------|-------------------|--------------|----------------|------|------|-------|-----------------------------------|--------|---------------------|----------------|------|-------|-------|-----------------------------------|--------|
| Breastfed infants |                               |                       |                   |              |                |      |      |       |                                   |        | Formula-fed infants |                |      |       |       |                                   |        |
| VITAMIN A         | Food                          | 190                   | 800               | 838          | 98.1           | 572  | 841  | 1083  | 0.00                              | 0.00   | 429                 | 52.6           | 122  | 372   | 935   | 12.5                              | 0.00   |
|                   | + mandatorily fortified food  | 190                   | 800               | 850          | 1.4            | 601  | 845  | 1083  | 0.00                              | 0.00   | 801                 | 45.6           | 433  | 751   | 1301  | 0.83                              | 5.79   |
|                   | + voluntarily fortified foods | 190                   | 800               | 854          | 0.5            | 601  | 861  | 1084  | 0.00                              | 4.17   | 815                 | 1.7            | 447  | 760   | 1378  | 0.83                              | 5.79   |
|                   | + supplements                 | 190                   | 800               | 854          | 0              | 601  | 861  | 1084  | 0.00                              | 4.17   | 815                 | 0              | 447  | 760   | 1378  | 0.83                              | 5.79   |
| VITAMIN D         | Food                          | 10                    | 25                | 1.10         | 10.0           | 0.88 | 1.03 | 1.44  | ns                                | 0.00   | 0.51                | 2.9            | 0.00 | 0.28  | 2.06  | ns                                | 0.00   |
|                   | + mandatorily fortified food  | 10                    | 25                | 1.23         | 1.2            | 0.88 | 1.03 | 2.14  | ns                                | 0.00   | 7.46                | 39.3           | 4.00 | 6.95  | 12.08 | ns                                | 0.83   |
|                   | + voluntarily fortified foods | 10                    | 25                | 1.38         | 1.4            | 0.88 | 1.12 | 2.51  | ns                                | 0.00   | 7.74                | 1.6            | 4.37 | 7.23  | 12.68 | ns                                | 0.83   |
|                   | + supplements                 |                       | 25                |              |                |      | 10.6 |       | ns/lo                             | 16.6   | 17.70               |                | 5.67 | 16.92 | 34.65 | low                               | 26.45  |
|                   |                               | 10                    |                   | 10.96        | 87.4           | 0.88 | 3    | 26.51 | w                                 | 7      |                     | 56.3           |      |       |       |                                   |        |
| VITAMIN E         | Food                          | 5                     | 100               | 5.03         | 96.7           | 2.60 | 4.78 | 7.82  | ns                                | 0.00   | 4.26                | 39.1           | 1.56 | 3.94  | 8.70  | ns                                | 0.00   |
|                   | + mandatorily fortified food  | 5                     | 100               | 5.08         | 1              | 2.60 | 4.78 | 7.82  | ns                                | 0.00   | 10.70               | 21.3           | 5.56 | 10.71 | 17.04 | low                               | 0.00   |
|                   | + voluntarily fortified foods | 5                     | 100               | 5.20         | 3.3            | 2.61 | 5.05 | 7.82  | low                               | 0.00   | 10.89               | 60.9           | 6.12 | 10.88 | 17.94 | low                               | 0.00   |
|                   | + supplements                 | 5                     | 100               | 5.20         | 0              | 2.61 | 5.05 | 7.82  | low                               | 0.00   | 10.89               | 0              | 6.12 | 10.88 | 17.94 | low                               | 0.00   |
| VITAMIN K         | Food                          | 8.5                   |                   | 50.9         | 83.9           | 6.4  | 40.3 | 148.0 | ns                                |        | 76.57               | 66             | 14.6 | 67.7  | 168.8 | low                               |        |
|                   | + mandatorily fortified food  | 8.5                   |                   | 51.2         | 0.5            | 6.4  | 40.3 | 148.0 | ns                                |        | 103.9               | 23.5           | 28.0 | 99.9  | 199.9 | low                               |        |
|                   | + voluntarily fortified foods | 8.5                   |                   | 51.2         | 0              | 6.4  | 40.3 | 148.0 | low                               |        | 104.2               | 0.3            | 29.5 | 99.9  | 203.3 | low                               |        |
|                   | + supplements                 | 8.5                   |                   | 60.7         | 15.7           | 6.4  | 40.3 | 153.0 | low                               |        | 116.1               | 10.2           | 29.5 | 109.2 | 203.5 | low                               |        |

<sup>(1)</sup> The AI for vitamin K is derived from an AI of 1  $\mu\text{g}$  per kg body weight and an average weight of 8.5 kg for infants aged 7 to 11 months (60).

<sup>(2)</sup> For infants 7-11 months nu UL is set for vitamin K.

EAR: Estimated average requirement; AI: Adequate intake; UL: Upper intake level

**Table S3** | Usual intake of **vitamin A, D, E and K** ( $\mu\text{g/day}$ ) from food, fortified food and supplements in **toddlers (12-35 months)**, Belgian study on the intake of vitamins A, D, E and K (VITADEK-study) 2015.

|           |                               | AI <sup>(1)</sup> | UL  | Usual intake | % contribution | 5     | 50    | 95     | Risk of inadequacy | % > UL |
|-----------|-------------------------------|-------------------|-----|--------------|----------------|-------|-------|--------|--------------------|--------|
| VITAMIN A | Food                          | 205               | 800 | 479          | 69.2           | 163   | 404   | 1053   | 11.15              | 0.8    |
|           | + mandatorily fortified food  | 205               | 800 | 567          | 12.7           | 193   | 507   | 1129   | 7.28               | 2.3    |
|           | + voluntarily fortified foods | 205               | 800 | 691          | 17.9           | 211   | 666   | 1265   | 4.98               | 3.1    |
|           | + supplements                 | 205               | 800 | 692          | 0.1            | 204   | 667   | 1265   | 4.98               | 3.1    |
| VITAMIN D | Food                          | 15                | 50  | 1.31         | 8.1            | 0.23  | 1.00  | 3.41   | ns                 | 0.00   |
|           | + mandatorily fortified food  | 15                | 50  | 2.71         | 8.6            | 0.47  | 1.44  | 8.09   | ns                 | 0.00   |
|           | + voluntarily fortified foods | 15                | 50  | 7.25         | 28             | 0.65  | 5.52  | 20.04  | ns                 | 0.00   |
|           | + supplements                 | 15                | 50  | 16.21        | 55.3           | 1.36  | 15.50 | 32.89  | low                | 0.00   |
| VITAMIN E | Food                          | 6                 | 60  | 4.70         | 57.5           | 1.76  | 3.80  | 10.25  | ns                 | 0.00   |
|           | + mandatorily fortified food  | 6                 | 60  | 6.01         | 16             | 1.79  | 4.40  | 14.63  | ns                 | 0.00   |
|           | + voluntarily fortified foods | 6                 | 60  | 8.13         | 25.9           | 2.06  | 7.78  | 15.80  | low                | 0.00   |
|           | + supplements                 | 6                 | 60  | 8.17         | 0.5            | 2.05  | 7.84  | 15.81  | low                | 0.00   |
| VITAMIN K | Food                          | 12                | 200 | 77.99        | 59.3           | 21.54 | 65.62 | 182.42 | low                | 3.83   |
|           | + mandatorily fortified food  | 12                | 200 | 83.39        | 4.1            | 22.49 | 72.88 | 186.62 | low                | 3.83   |
|           | + voluntarily fortified foods | 12                | 200 | 91.42        | 6.1            | 25.56 | 82.28 | 186.63 | low                | 4.21   |
|           | + supplements                 | 12                | 200 | 131.48       | 30.5           | 25.10 | 84.61 | 207.17 | low                | 4.90   |

<sup>(1)</sup> The AI for vitamin K is derived from an AI of 1  $\mu\text{g}$  per kg body weight and an average weight of 12 kg for infants aged 12-35 months (60).

EAR: Estimated average requirement. AI: Adequate intake; UL: Upper intake level

**Table S4** | Usual intake of **vitamin A, D, E and K** ( $\mu\text{g}/\text{day}$ ) from food, fortified food and supplements in **pregnant women**, Belgian study on the intake of vitamins A, D, E and K (VITADEK-study) 2015.

|           |                               | EAR/AI <sup>(1)</sup> | UL   | Usual intake | % contribution | 5    | 50    | 95    | % < EAR/Risk of inadequacy | % > UL |
|-----------|-------------------------------|-----------------------|------|--------------|----------------|------|-------|-------|----------------------------|--------|
| VITAMIN A | Food                          | 540                   | 3000 | 746          | 92.7           | 214  | 656   | 1710  | 18                         | 0.34   |
|           | + mandatorily fortified food  | 540                   | 3000 | 784          | 4.7            | 267  | 665   | 1728  | 17                         | 0.34   |
|           | + voluntarily fortified foods | 540                   | 3000 | 803          | 2.4            | 267  | 669   | 1821  | 16                         | 0.34   |
|           | + supplements                 | 540                   | 3000 | 805          | 0.2            | 267  | 669   | 1821  | 16                         | 0.34   |
| VITAMIN D | Food                          | 15                    | 100  | 2.72         | 32.4           | 0.63 | 2.46  | 5.82  | ns                         | 0      |
|           | + mandatorily fortified food  | 15                    | 100  | 3.03         | 3.7            | 0.64 | 2.81  | 5.95  | ns                         | 0      |
|           | + voluntarily fortified foods | 15                    | 100  | 3.29         | 3.1            | 0.89 | 2.86  | 6.99  | ns                         | 0      |
|           | + supplements                 | 15                    | 100  | 8.40         | 60.8           | 1.48 | 7.58  | 18.75 | ns                         | 0      |
| VITAMIN E | Food                          | 11                    | 300  | 10.12        | 57.1           | 3.00 | 8.20  | 16.97 | ns                         | 0      |
|           | + voluntarily fortified food  | 11                    | 300  | 11.40        | 7.2            | 3.34 | 8.56  | 21.89 | ns                         | 0      |
|           | + supplements                 | 11                    | 300  | 17.73        | 35.7           | 6.41 | 15.90 | 34.36 | low                        | 0      |
| VITAMIN K | Food                          | 70                    | 1000 | 127          | 99.2           | 36   | 107   | 308   | low                        | 0      |
|           | + voluntarily fortified foods | 70                    | 1000 | 127          | 0              | 36   | 107   | 308   | low                        | 0      |
|           | + supplements                 | 70                    | 1000 | 128          | 0.8            | 36   | 107   | 308   | low                        | 0      |

EAR: Estimated average requirement; AI: Adequate intake; UL: Upper intake level

**Table S5** | Usual intake of **vitamin A, D, E and K** ( $\mu\text{g/day}$ ) from food, fortified food and supplements in **breastfeeding women**, Belgian study on the intake of vitamins A, D, E and K (VITADEK-study) 2015.

|           |                               | EAR/AI <sup>(1)</sup> | UL   | Usual intake | % contribution | 5    | 50    | 95    | % < EAR/Risk of inadequacy | % > UL |
|-----------|-------------------------------|-----------------------|------|--------------|----------------|------|-------|-------|----------------------------|--------|
| VITAMIN A | Food                          | 1020                  | 3000 | 894          | 93.4           | 288  | 696   | 2103  | 36                         | 0.00   |
|           | + mandatorily fortified food  | 1020                  | 3000 | 932          | 4              | 334  | 745   | 2169  | 35                         | 0.00   |
|           | + voluntarily fortified foods | 1020                  | 3000 | 954          | 2.3            | 363  | 745   | 2279  | 35                         | 0.00   |
|           | + supplements                 | 1020                  | 3000 | 957          | 0.3            | 363  | 755   | 2279  | 35                         | 0.00   |
| VITAMIN D | Food                          | 15                    | 100  | 3.04         | 29.6           | 1.12 | 2.50  | 7.16  | ns                         | 0.00   |
|           | + mandatorily fortified food  | 15                    | 100  | 3.36         | 3.1            | 1.13 | 2.88  | 7.95  | ns                         | 0.00   |
|           | + voluntarily fortified foods | 15                    | 100  | 4.05         | 6.7            | 1.25 | 3.49  | 9.04  | ns                         | 0.00   |
|           | + supplements                 | 15                    | 100  | 10.28        | 60.6           | 2.04 | 9.07  | 22.68 | ns                         | 0.00   |
| VITAMIN E | Food                          | 11                    | 300  | 11.31        | 56             | 4.50 | 9.64  | 30.98 | ns                         | 0.00   |
|           | + voluntarily fortified food  | 11                    | 300  | 12.56        | 6.2            | 5.08 | 10.06 | 32.38 | ns                         | 0.00   |
|           | + supplements                 | 11                    | 300  | 20.2         | 37.8           | 7.67 | 18.12 | 44.36 | low                        | 0.00   |
| VITAMIN K | Food                          | 70                    | 1000 | 155          | 99.4           | 46   | 126   | 358   | low                        | 0.31   |
|           | + voluntarily fortified foods | 70                    | 1000 | 156          | 0.6            | 51   | 127   | 358   | low                        | 0.31   |
|           | + supplements                 | 70                    | 1000 | 156          | 0              | 51   | 127   | 358   | low                        | 0.31   |

EAR: Estimated average requirement; AI: Adequate intake; UL: Upper intake level

**Table S6** | Usual intake of **retinol** ( $\mu\text{g}/\text{day}$ ) from food, fortified food and supplements in **infants, toddlers, pregnant and lactating women**, Belgian study on the intake of vitamins A, D, E and K (VITADEK-study) 2015.

|                     |                               | Usual intake | 5         | 50  | 95  | UL   | % > UL | Usual intake | 5    | 50   | 95  | UL  | % > UL |
|---------------------|-------------------------------|--------------|-----------|-----|-----|------|--------|--------------|------|------|-----|-----|--------|
| Infants 0-6 months  |                               |              | Breastfed |     |     |      |        | Formula-fed  |      |      |     |     |        |
|                     | Food                          | 528          | 497       | 551 | 578 | 800  | 0.00   | 85           | 0    | 7    | 421 | 800 | 0.00   |
|                     | + mandatorily fortified food  | 531          | 497       | 551 | 605 | 800  | 0.00   | 500          | 288  | 486  | 742 | 800 | 1.46   |
|                     | + voluntarily fortified foods | 532          | 497       | 551 | 606 | 800  | 0.00   | 504          | 295  | 490  | 742 | 800 | 1.94   |
|                     | + supplements                 | 532          | 497       | 551 | 606 | 800  | 0.00   | 504          | 295  | 490  | 738 | 800 | 1.94   |
| Infants 7-11 months |                               |              |           |     |     |      |        |              |      |      |     |     |        |
|                     | Food                          | 580          | 562       | 566 | 642 | 800  | 0.00   | 62.0         | 0.13 | 15.5 | 383 | 800 | 0.00   |
|                     | + mandatorily fortified food  | 590          | 562       | 569 | 667 | 800  | 0.00   | 435          | 233  | 377  | 821 | 800 | 5.79   |
|                     | + voluntarily fortified foods | 595          | 562       | 578 | 667 | 800  | 4.17   | 448          | 255  | 390  | 826 | 800 | 5.79   |
|                     | + supplements                 | 595          | 562       | 578 | 667 | 800  | 4.17   | 448          | 255  | 390  | 826 | 800 | 5.79   |
| Toddlers            |                               |              |           |     |     |      |        |              |      |      |     |     |        |
|                     | Food                          | 161          | 5.37      | 111 | 581 | 800  | 0.8    |              |      |      |     |     |        |
|                     | + mandatorily fortified food  | 248          | 36.6      | 196 | 651 | 800  | 2.3    |              |      |      |     |     |        |
|                     | + voluntarily fortified foods | 368          | 49.9      | 367 | 746 | 800  | 2.7    |              |      |      |     |     |        |
|                     | + supplements                 | 370          | 43.4      | 373 | 746 | 800  | 3.1    |              |      |      |     |     |        |
| Pregnant women      |                               |              |           |     |     |      |        |              |      |      |     |     |        |
|                     | Food                          | 294          | 58        | 228 | 666 | 3000 | 0.34   |              |      |      |     |     |        |
|                     | + mandatorily fortified food  | 329          | 68        | 248 | 705 | 3000 | 0.34   |              |      |      |     |     |        |
|                     | + voluntarily fortified foods | 329          | 68        | 252 | 705 | 3000 | 0.34   |              |      |      |     |     |        |
|                     | + supplements                 | 332          | 68        | 252 | 705 | 3000 | 0.34   |              |      |      |     |     |        |
| Lactating women     |                               |              |           |     |     |      |        |              |      |      |     |     |        |
|                     | Food                          | 298          | 76        | 251 | 638 | 3000 | 0.00   |              |      |      |     |     |        |
|                     | + mandatorily fortified food  | 332          | 101       | 298 | 668 | 3000 | 0.00   |              |      |      |     |     |        |
|                     | + voluntarily fortified foods | 338          | 101       | 299 | 668 | 3000 | 0.00   |              |      |      |     |     |        |
|                     | + supplements                 | 342          | 112       | 303 | 668 | 3000 | 0.00   |              |      |      |     |     |        |

UL: Upper intake level
